# Supplementary material for: A transposable element insertion in the susceptibility gene CsaMLO8 results in hypocotyl resistance to powdery mildew in cucumber
Source: PubMed Central journal article supplement (PMC4600303; doi:10.1186/s12870-015-0635-x), 2015-10-09

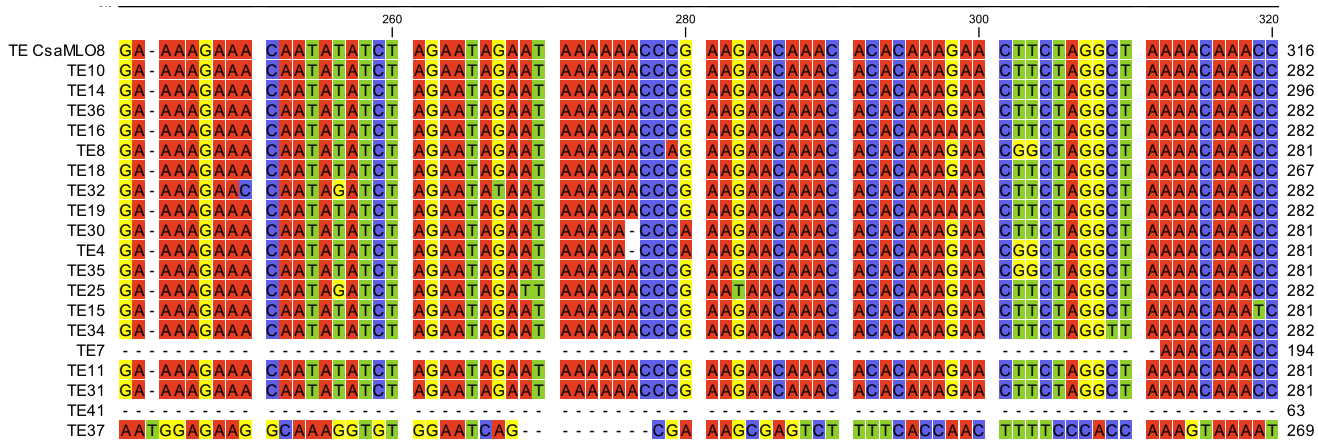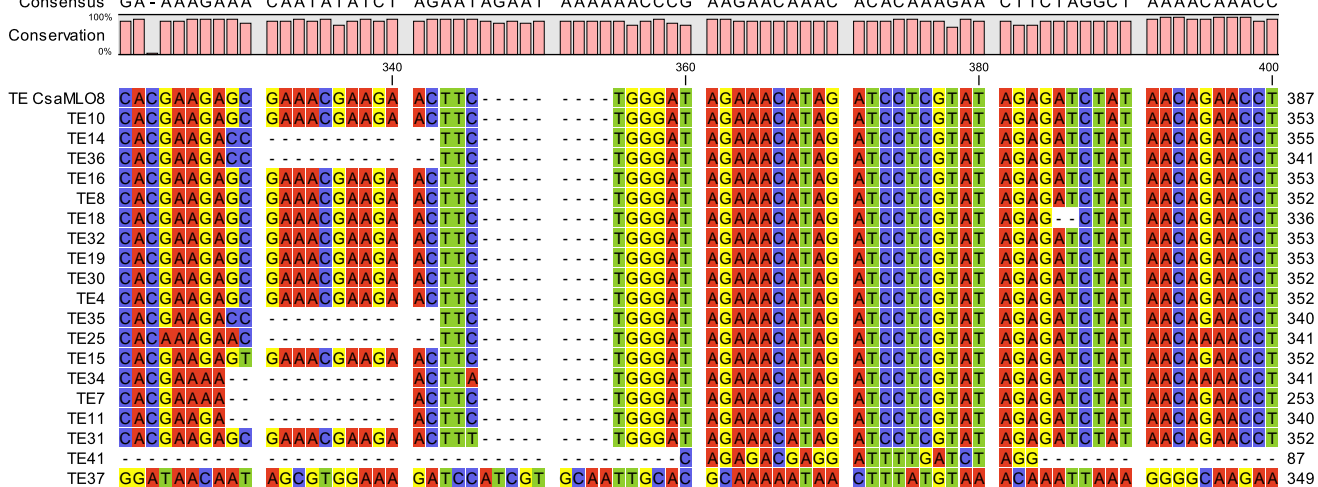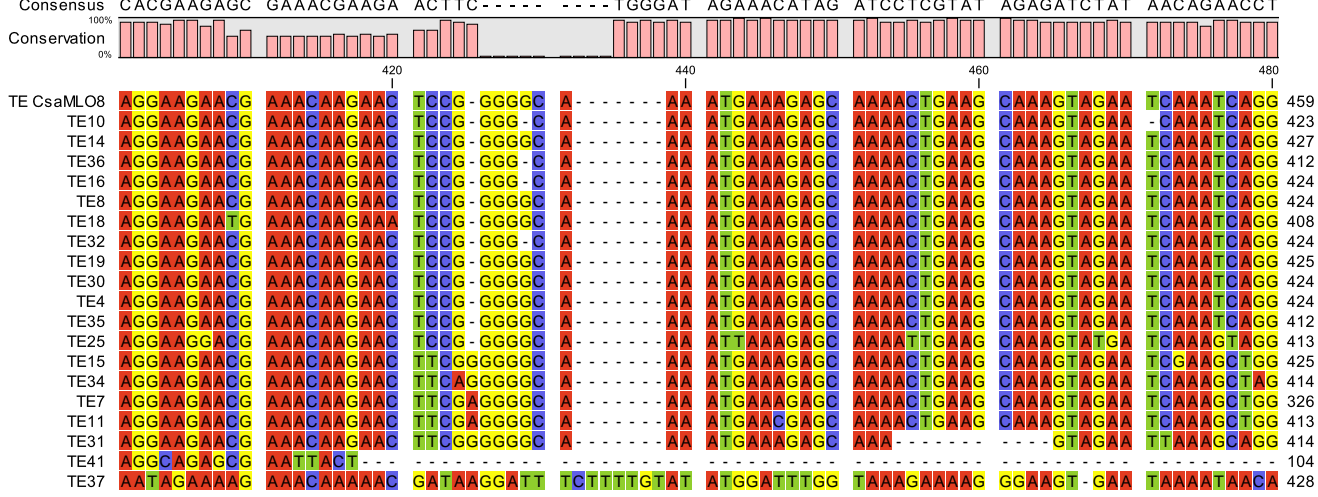



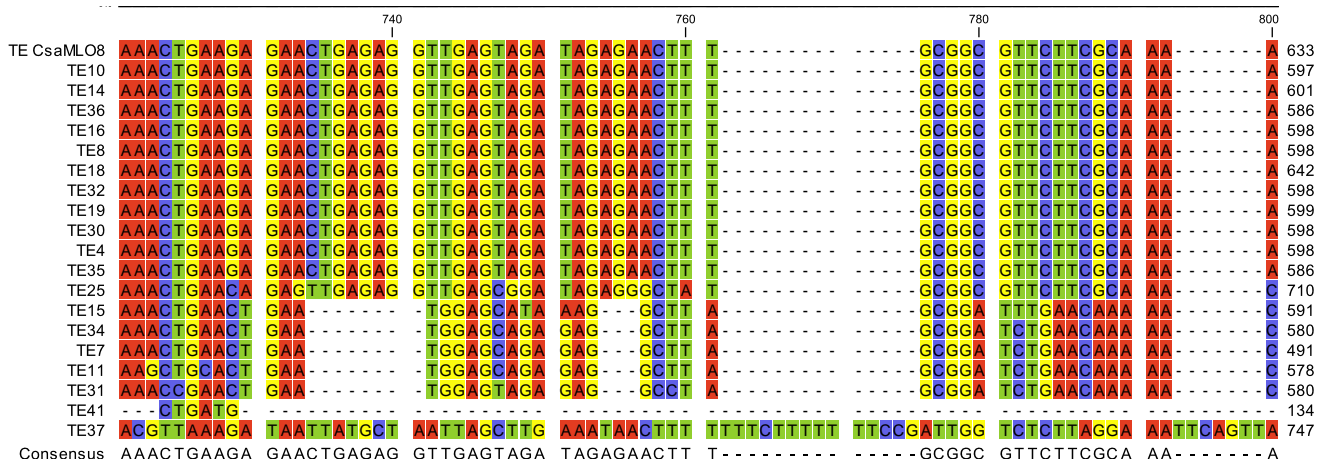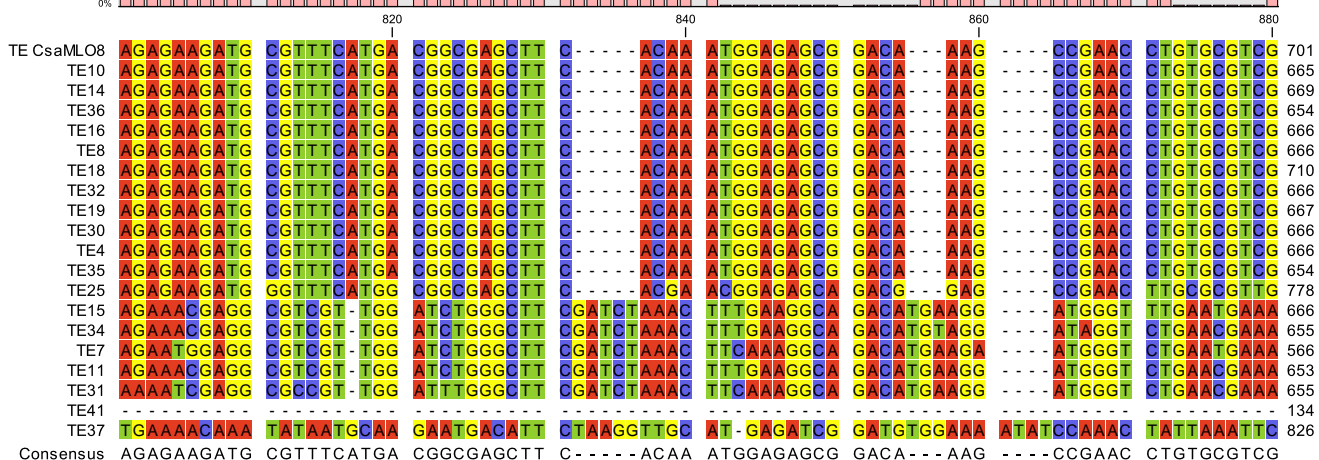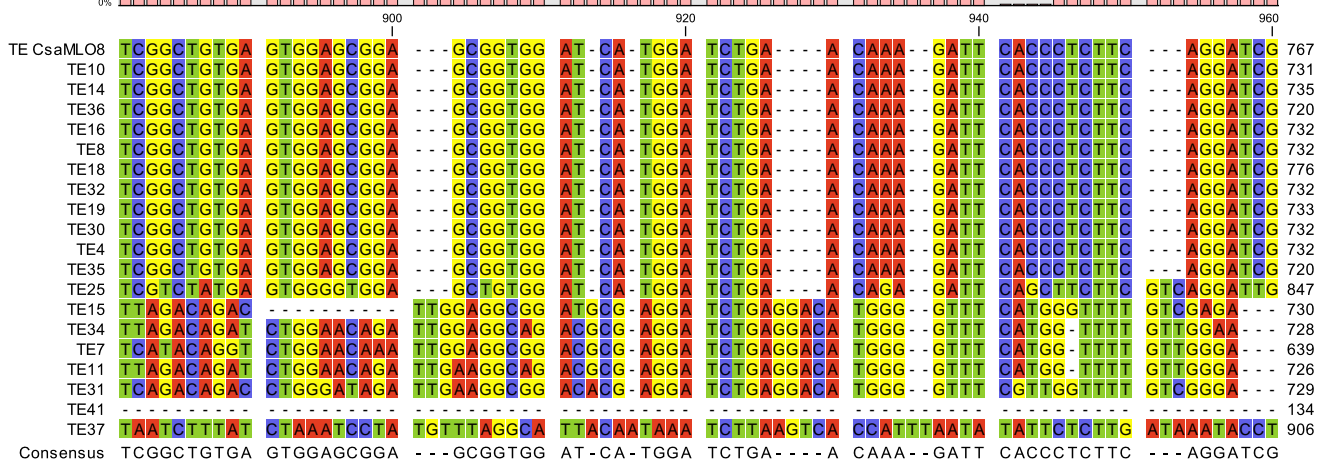

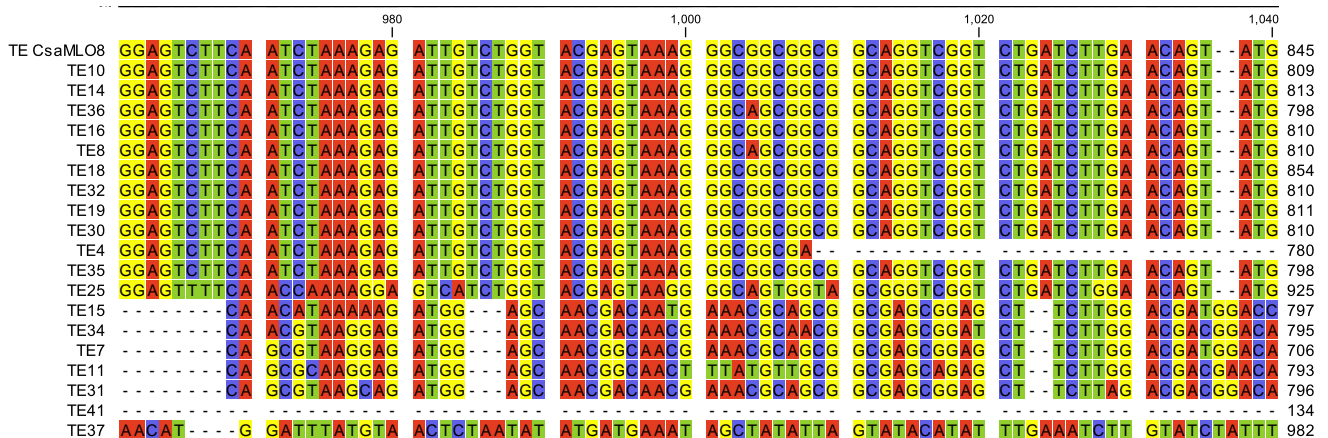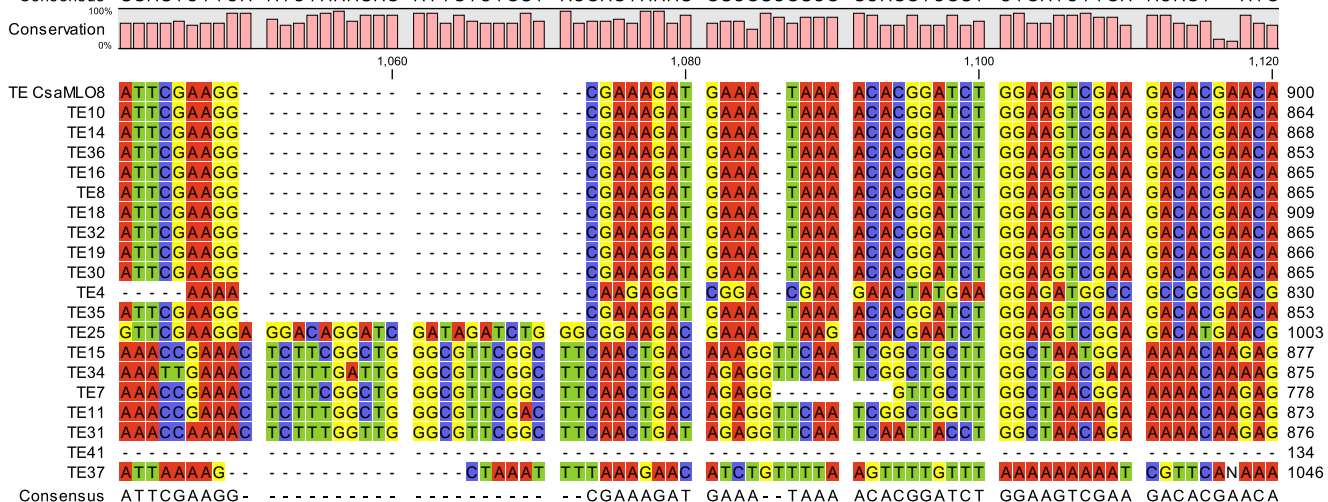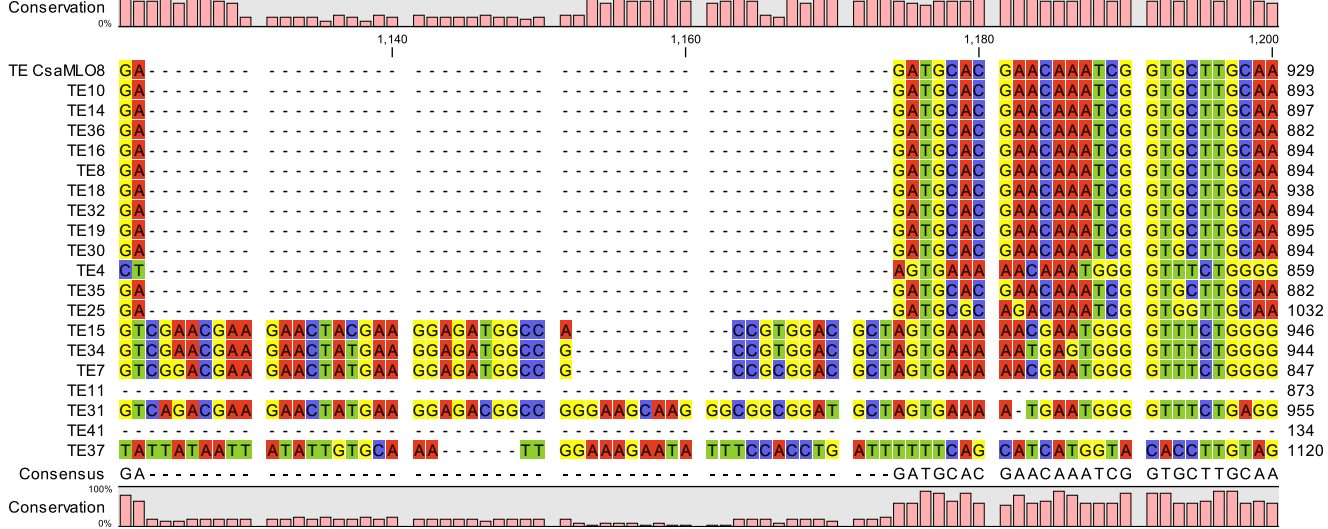

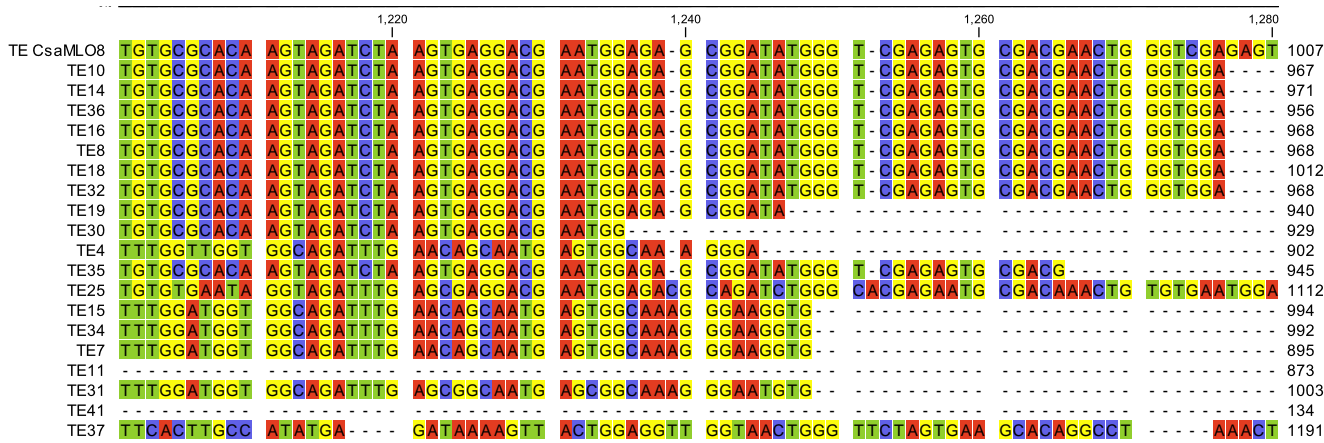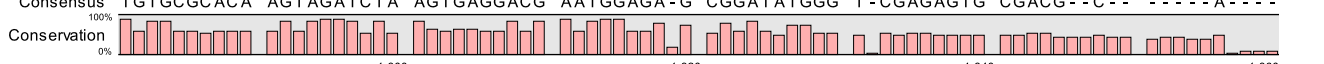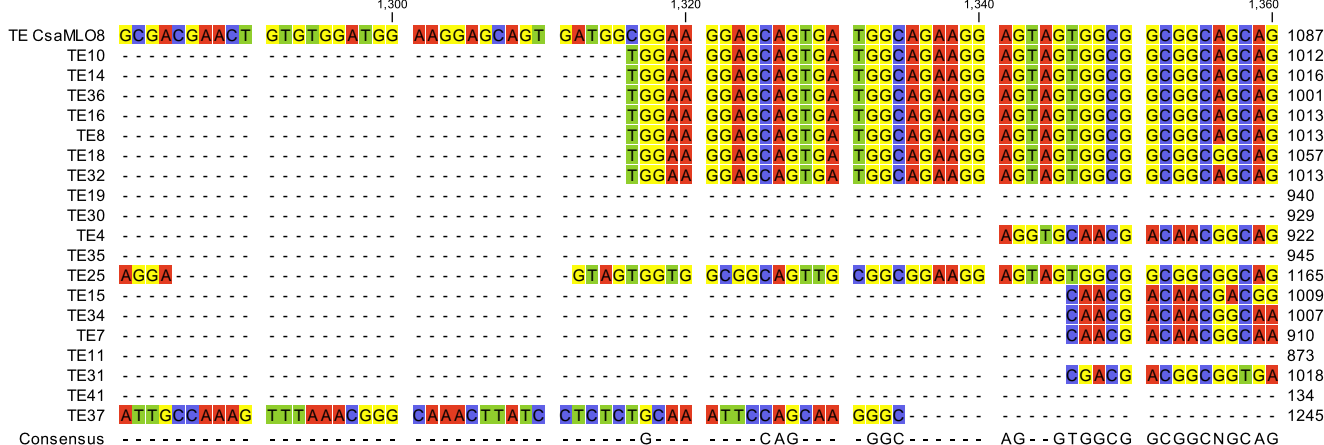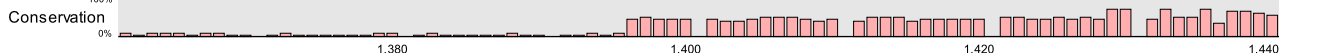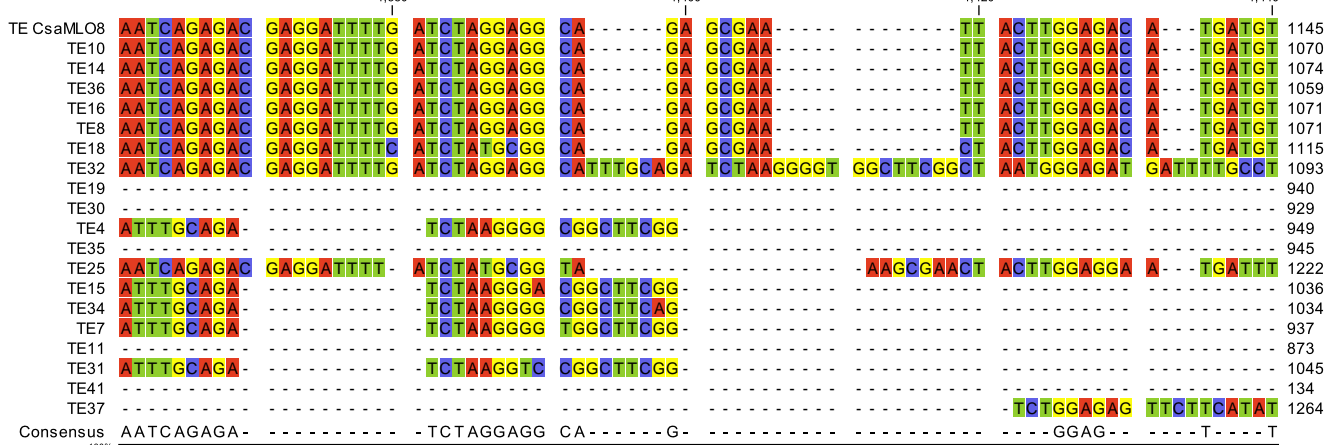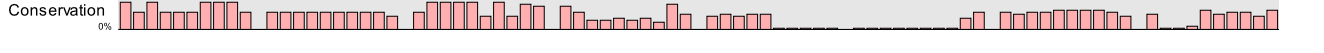

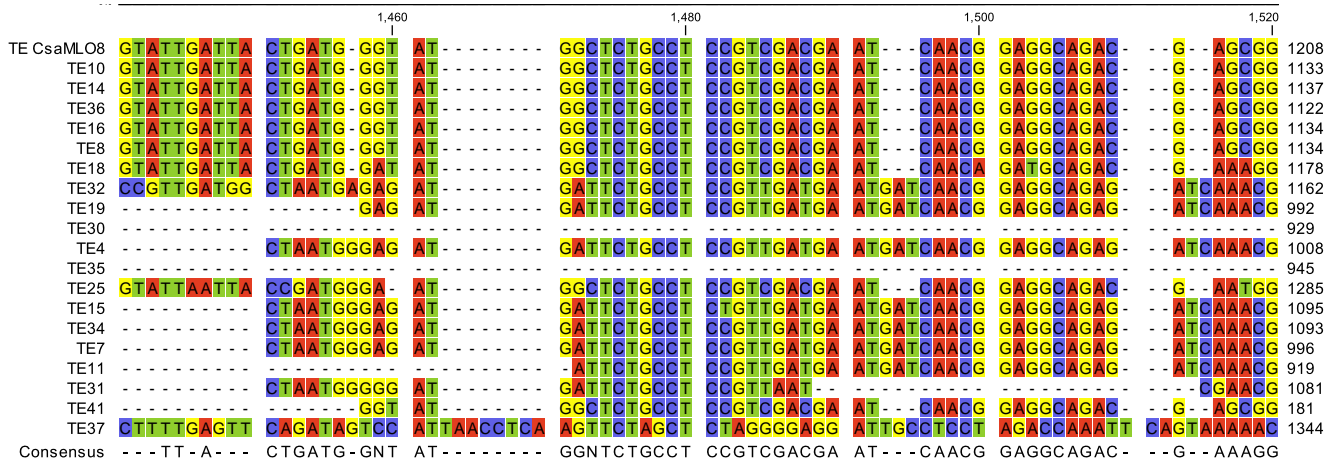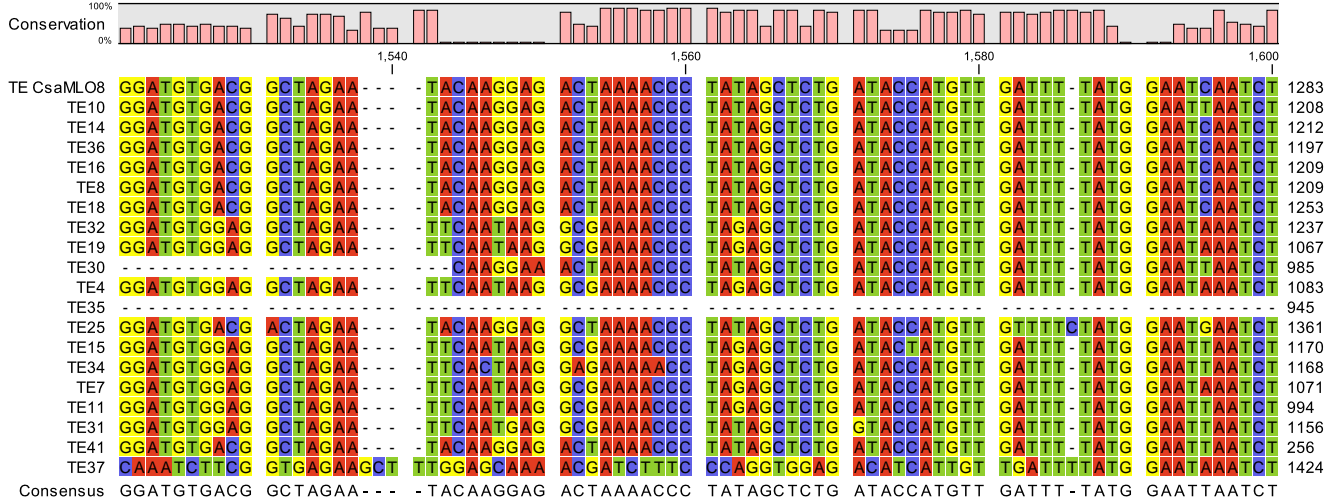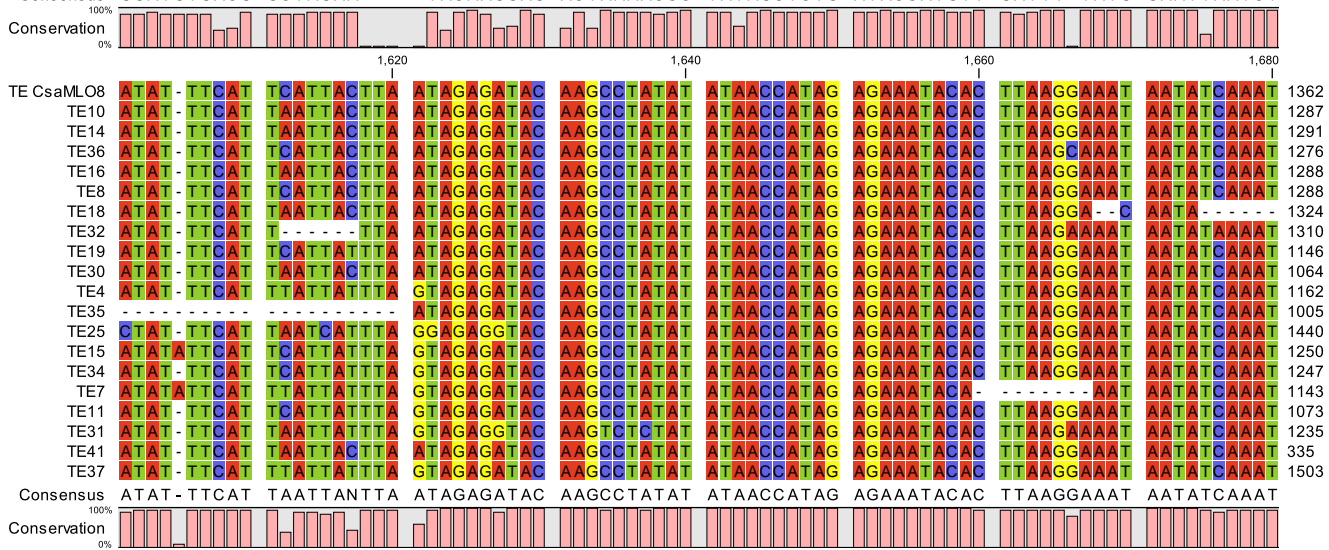

Supplement: 12870_2015_635_MOESM6_ESM.pdf [file 12870_2015_635_MOESM6_ESM.pdf]
