# Supplementary material for: A transposable element insertion in the susceptibility gene CsaMLO8 results in hypocotyl resistance to powdery mildew in cucumber
Source: PubMed Central journal article supplement (PMC4600303; doi:10.1186/s12870-015-0635-x), 2015-10-09
Supplement: 12870_2015_635_MOESM1_ESM.pdf [file 12870_2015_635_MOESM1_ESM.pdf]

|             |             |             |            |             |            |            |            |            |      |
|-------------|-------------|-------------|------------|-------------|------------|------------|------------|------------|------|
|             |             | 1,460       |            | 1,460       |            | 1,500      |            | 1,520      |      |
| CsaMLO8 WT  | TCTCCTATTCT | ACCTTCTGCA  | AAAACATCAG | CATGGCAGCA  | CATCTCCAG  | GCTATCCGAT | GCCGAACCCG | ATCGTTGGGA | 1520 |
| CsaMLO8Δ72  | TCTCCTATTCT | ACCTTCTGCA  | AAAACATCAG | CATGGCAGCA  | CATCTCCAG  | GCTATCCGAT | GCCGAACCCG | ATCGTTGGGA | 1448 |
| CsaMLO8Δ174 | TCTCCTATTCT | ACCTTCTGCA  | AAAACATCAG | CATGGCAGCA  | CATCTCCAG  | GCTATCCGAT | GCCGAACCCG | ATCGTTGGGA | 1346 |
|             |             | 1,540       |            | 1,560       |            | 1,580      |            | 1,600      |      |
| CsaMLO8 WT  | AGAGTTGCCCT | CCTTCTTCAC  | AACATAGTAG | AGCCCCCAT   | CATGATAATC | ATCAAGATCA | ACAAGAACAA | TCTGAGACAA | 1600 |
| CsaMLO8Δ72  | AGAGTTGCCCT | CCTTCTTCAC  | AACATAGTAG | AGCCCCCAT   | CATGATAATC | ATCAAGATCA | ACAAGAACAA | TCTGAGACAA | 1528 |
| CsaMLO8Δ174 | AGAGTTGCCCT | CCTTCTTCAC  | AACATAGTAG | AGCCCCCAT   | CATGATAATC | ATCAAGATCA | ACAAGAACAA | TCTGAGACAA | 1426 |
|             |             | 1,620       |            | 1,640       |            | 1,660      |            | 1,680      |      |
| CsaMLO8 WT  | TAAATTAGAGA | ACAGGAGATG  | AAGTTCAAG  | GACCAAGTTC  | AAGTGAAACC | GGTTCATATA | CACGTCTG   | TGCGCTCAT  | 1680 |
| CsaMLO8Δ72  | TAAATTAGAGA | ACAGGAGATG  | AAGTTCAAG  | GACCAAGTTC  | AAGTGAAACC | GGTTCATATA | CACGTCTG   | TGCGCTCAT  | 1608 |
| CsaMLO8Δ174 | TAAATTAGAGA | ACAGGAGATG  | AAGTTCAAG  | GACCAAGTTC  | AAGTGAAACC | GGTTCATATA | CACGTCTG   | TGCGCTCAT  | 1506 |
|             |             | 1,700       |            | 1,720       |            |            |            |            |      |
| CsaMLO8 WT  | CAGGAAATCA  | C TAGGACTCC | ATCAGACTTC | TCAATTTGCCA | AATGA      |            |            |            | 1725 |
| CsaMLO8Δ72  | CAGGAAATCA  | C TAGGACTCC | ATCAGACTTC | TCAATTTGCCA | AATGA      |            |            |            | 1653 |
| CsaMLO8Δ174 | CAGGAAATCA  | C TAGGACTCC | ATCAGACTTC | TCAATTTGCCA | AATGA      |            |            |            | 1551 |
