# Supplementary material for: A transposable element insertion in the susceptibility gene CsaMLO8 results in hypocotyl resistance to powdery mildew in cucumber
Source: PubMed Central journal article supplement (PMC4600303; doi:10.1186/s12870-015-0635-x), 2015-10-09
Supplement: 12870_2015_635_MOESM4_ESM.pdf [file 12870_2015_635_MOESM4_ESM.pdf]

*ol-2* 35S::*CsaMLO8* WT transformants:

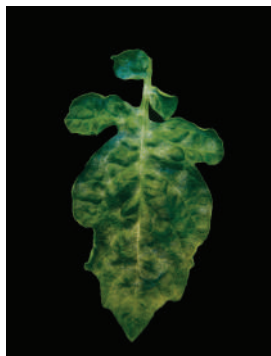

35S::*CsaMLO8* WT - A

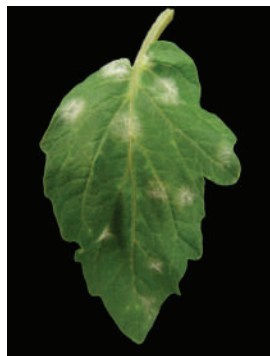

35S::*CsaMLO8* WT - B

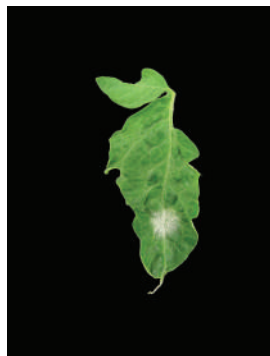

35S::*CsaMLO8* WT - C

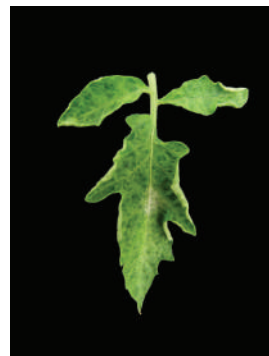

35S::*CsaMLO8* WT - D

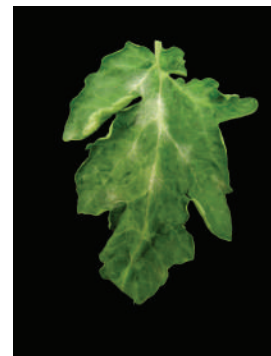

35S::*CsaMLO8* WT - E

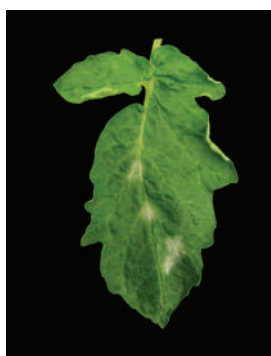

35S::*CsaMLO8* WT - F

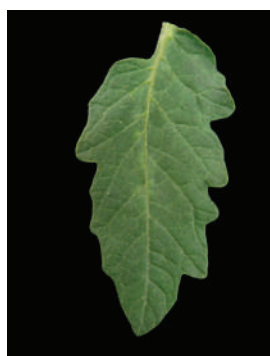

35S::*CsaMLO8* WT - G

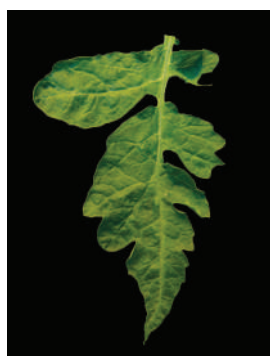

35S::*CsaMLO8* WT - H

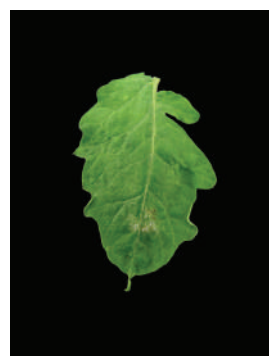

35S::*CsaMLO8* WT - I

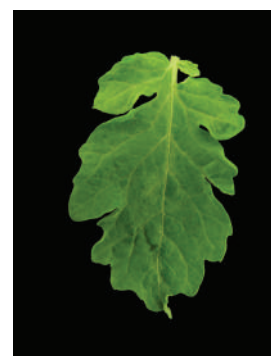

35S::*CsaMLO8* WT - J

*ol-2* 35S::*CsaMLO8*  $\Delta$ 174 transformants:

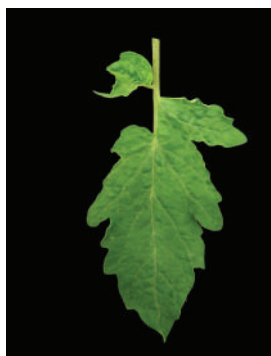

35S::*CsaMLO8*  $\Delta$ 174 - A

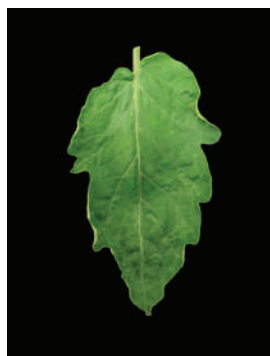

35S::*CsaMLO8*  $\Delta$ 174 - B

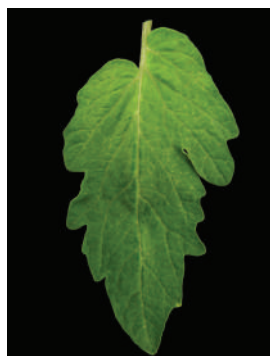

35S::*CsaMLO8*  $\Delta$ 174 - C

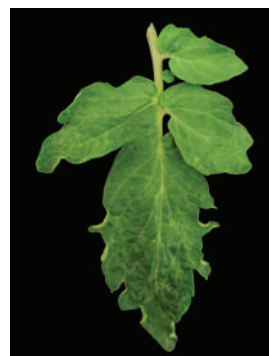

35S::*CsaMLO8*  $\Delta$ 174 - D

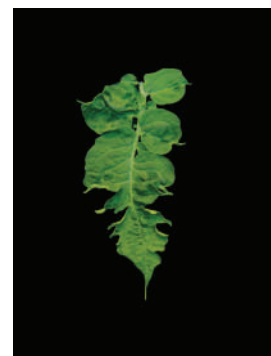

35S::*CsaMLO8*  $\Delta$ 174 - E

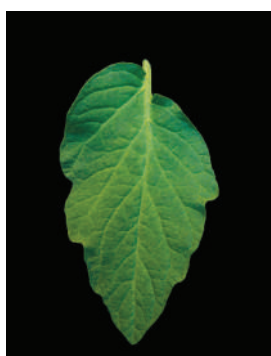

35S::*CsaMLO8*  $\Delta$ 174 - F

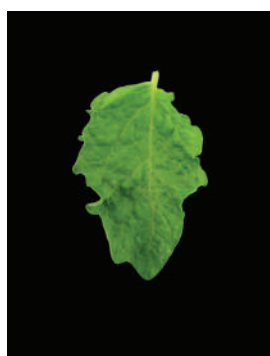

35S::*CsaMLO8*  $\Delta$ 174 - G

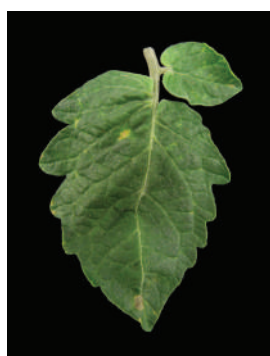

35S::*CsaMLO8*  $\Delta$ 174 - H

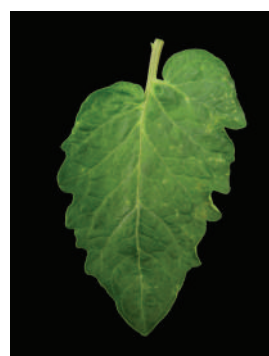

35S::*CsaMLO8*  $\Delta$ 174 - I

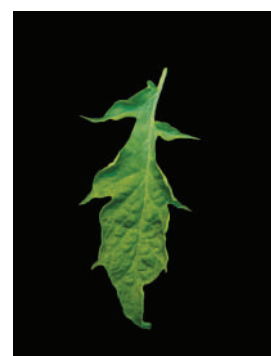

35S::*CsaMLO8*  $\Delta$ 174 - J
